# Supplementary material for: Identifying Selection in the Within-Host Evolution of Influenza Using Viral Sequence Data
Source: PubMed Central journal article supplement (PMC4117419; doi:10.1371/journal.pcbi.1003755), 2014-07-31

Pig104

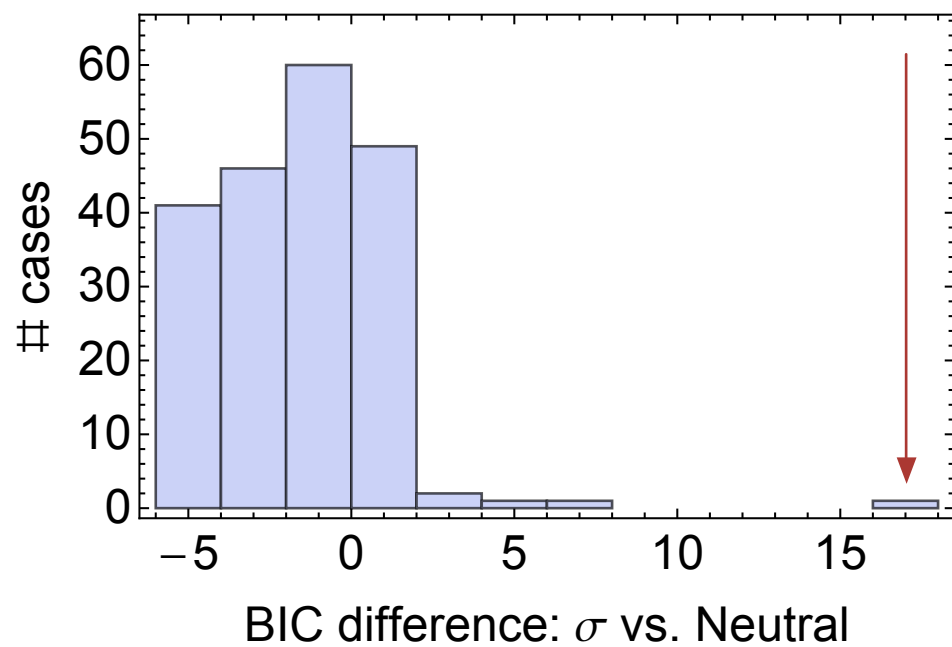

Pig109

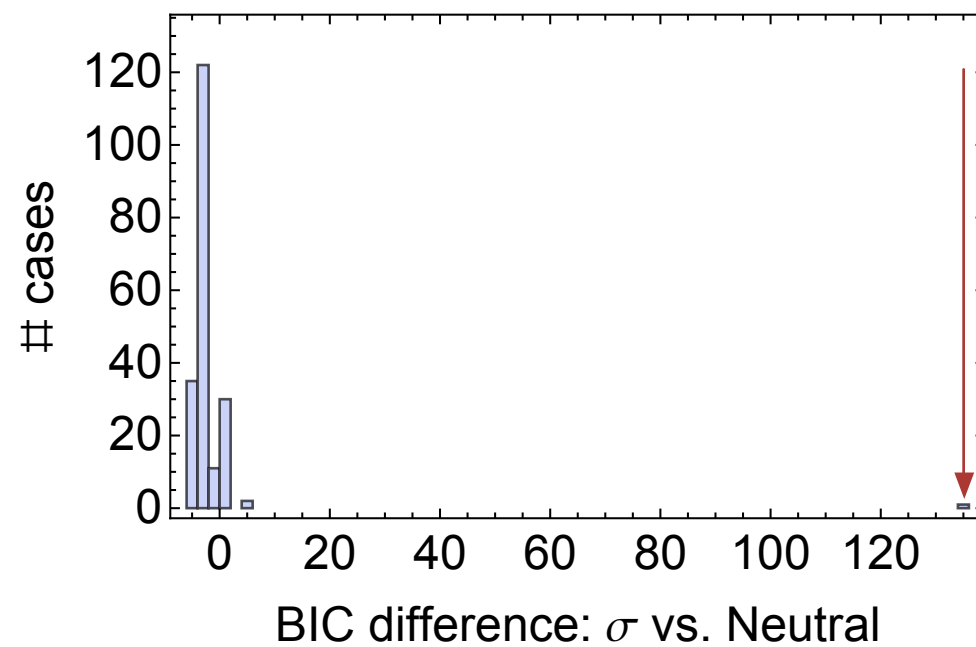

Supplement: pcbi.1003755.s002.pdf [file pcbi.1003755.s002.pdf]
