# Supplementary material for: Identifying Selection in the Within-Host Evolution of Influenza Using Viral Sequence Data
Source: PLOS journal article supplement (doi:10.1371/journal.pcbi.1003755), 2014-07-31
Supplement: S9 (10.1371/journal.pcbi.1003755.s009) [file journal.pcbi.1003755.s009]

301 Moved Permanently

# Moved Permanently

The document has moved here.

---

Apache Server at www.ploscompbiol.org Port 80
